# Supplementary material
Source: publisher site journal article supplement (https://static.cambridge.org/content/id/urn:cambridge.org:id:article:S2040174420000355/resource/name/S2040174420000355supp001.docx)
Supplement: Supplementary file 1 [file S2040174420000355supp001.docx]

| **Animal Studies** | | | | | | | | |
| --- | --- | --- | --- | --- | --- | --- | --- | --- |
| **Author, year** | **Q1** | **Q2** | **Q3** | **Q4** | **Q5** | **Q6** | **Q7** | **Q8** |
| Cortese, 2016 | N | NR | NR | N | Y | Y | Y | NA |
| Gozal, 2003 | N | NR | NR | N | NR | Y | NR | NA |
| Iqbal, 2013 | N | NR | NR | N | NR | Y | NR | NA |
| Khalyfa, 2014 | N | NR | NR | N | Y | Y | Y | NA |
| Khalyfa, 2015 | N | Y | NR | N | NR | Y | NR | NA |
| Khalyfa, 2017 | N | NR | NR | N | NR | Y | NR | NA |
| McDonald, 2016 | N | NR | NR | Y | NR | Y | NR | NA |
| Mutskov, 2015 | N | Y | NR | N | NR | Y | NR | NA |
| Trzepizur, 2017 | N | NR | NR | N | NR | Y | NR | NA |
| Y=Yes; N=No: NR=Not Reported; NA=Not Applicable | | | | | | | | |
| Q1. Allocation sequence adequately generated and applied?; Q2. Groups similar at baseline or adjusted for in analysis?; Q3. Allocation adequately concealed?; Q4. Animals randomly housed during the experiment?; Q5. Caregivers/investigators blinded from intervention each animal received?; Q6. Animals selected at random for outcome assessment?; Q7. Outcome assessor blind?; Q8. Incomplete outcome data adequately addressed? | | | | | | | | |

**Table S1: Quality Review of Animal Studies.** SYRCLE Quality tool was used to review the animal studies.
